# Supplementary material for: Radiomics in Cross-Sectional Adrenal Imaging: A Systematic Review and Quality Assessment Study
Source: MDPI journal article supplement (doi:10.3390/diagnostics12030578), 2022-02-24

**Table S1.** Radiomics quality score items and their respective scores as describe by Lambin et al. [Lambin, P., Leijenaar, R., Deist, T. et al. Radiomics: the bridge between medical imaging and personalized medicine. *Nat Rev Clin Oncol* 14, 749–762 (2017). <https://doi.org/10.1038/nrclinonc.2017.141>]. The mode for each item in the studies included in the present systematic review is also reported.

| Items                                                              | Definitions and points                                                                                                                                                                                            | Scores      | Mode |
|--------------------------------------------------------------------|-------------------------------------------------------------------------------------------------------------------------------------------------------------------------------------------------------------------|-------------|------|
| <b>1</b><br>(Image protocol quality)                               | Assign one point if the imaging protocols have been properly reported (increasing reproducibility) and one further point in case public protocols have been used.                                                 | From 0 to 2 | 1    |
| <b>2</b><br>(Multiple segmentations)                               | Assign one point if feature robustness to segmentation variabilities has been tested                                                                                                                              | 0 or 1      | 0    |
| <b>3</b><br>(Phantom study on all scanners)                        | Assign one point if feature robustness to scanner variabilities has been tested using a phantom                                                                                                                   | 0 or 1      | 0    |
| <b>4</b><br>(Imaging at multiple time points)                      | Assign one point if feature robustness to temporal variabilities has been tested                                                                                                                                  | 0 or 1      | 0    |
| <b>5</b><br>(Feature reduction or adjustment for multiple testing) | Assign three points if either feature reduction or adjustment for multiple testing has been performed, otherwise subtract three points                                                                            | -3 or +3    | 3    |
| <b>6</b><br>(Multivariable analysis with non-radiomics features)   | Assign one point if non-radiomics features have been included                                                                                                                                                     | 0 or 1      | 0    |
| <b>7</b><br>(Biological correlates)                                | Assign one point if biological correlates have been analyzed                                                                                                                                                      | 0 or 1      | 0    |
| <b>8</b><br>(Cut-off analyses)                                     | Assign one point if cut-off analyses have been performed                                                                                                                                                          | 0 or 1      | 0    |
| <b>9</b><br>(Discrimination statistics)                            | Assign one point if a discrimination statistic (with statistical significance) has been performed, and one additional point in case a resampling method (e.g. bootstrapping or cross-validation) was applied too. | From 0 to 2 | 1    |
| <b>10</b><br>(Calibration statistics)                              | Assign one point if a calibration statistic (with statistical significance) has been performed, and one additional point in case a resampling method (e.g. bootstrapping or cross-validation) was applied too.    | From 0 to 2 | 0    |

|                                                                 |                                                                                                                                                                                                                                                                                                                                                   |                        |    |
|-----------------------------------------------------------------|---------------------------------------------------------------------------------------------------------------------------------------------------------------------------------------------------------------------------------------------------------------------------------------------------------------------------------------------------|------------------------|----|
| <b>11</b><br>(Prospective study registered in a trial database) | Assign seven points if the study design was prospective                                                                                                                                                                                                                                                                                           | 0 or 7                 | 0  |
| <b>12</b><br>(Validation)                                       | Assign two points for internal validation, three points for a single external validation dataset, four points for either two independent external validation datasets or validation of a previously published signature or five points for three or more independent external validation datasets. Subtract five points if validation is missing. | -5 or 2 or 3 or 4 or 5 | -5 |
| <b>13</b><br>(Comparison to “gold standard”)                    | Assign one point if the model has been compared to the current ‘gold standard’.                                                                                                                                                                                                                                                                   | 0 or 2                 | 0  |
| <b>14</b><br>(Potential clinical utility)                       | Assign two points if the clinical applicability of the model has been formally assessed (e.g. decision curve analysis).                                                                                                                                                                                                                           | 0 or 2                 | 0  |
| <b>15</b><br>(Cost-effectiveness analysis)                      | Assign one point if cost-effectiveness analysis of the clinical application has been performed.                                                                                                                                                                                                                                                   | 0 or 1                 | 0  |
| <b>16</b><br>(Open science and data)                            | Assign one point for each of the following:<br>1) Medical images are open source<br>2) Segmentations are open source<br>3) Code is open source<br>4) Radiomics features are calculated on a set of representative segmentations (both open source)                                                                                                | From 0 to 4            | 0  |

**Table S2.** Basic principles of the most adopted machine learning algorithms in adrenal imaging.

| Algorithm name                | Basic functioning principle                                                                                                                                                | Main advantages                                                                                                                                                                                      | Main disadvantages                                                                                                                                            |
|-------------------------------|----------------------------------------------------------------------------------------------------------------------------------------------------------------------------|------------------------------------------------------------------------------------------------------------------------------------------------------------------------------------------------------|---------------------------------------------------------------------------------------------------------------------------------------------------------------|
| <b>Naive Bayes</b>            | A probabilistic model based on the Bayes' theorem with the assumption of strong (naive) independence between the features data                                             | <ul style="list-style-type: none"> <li>• Ideal for classification tasks</li> <li>• Low computational complexity</li> <li>• Efficient on small datasets</li> </ul>                                    | <ul style="list-style-type: none"> <li>• Independence between features, which is unlikely in real life cases</li> <li>• The zero-frequency problem</li> </ul> |
| <b>Support Vector Machine</b> | This technique aims to identify the best hyper plans in an n-dimensional space (n= the number of features) meant as decision boundaries that help classify the data points | <ul style="list-style-type: none"> <li>• Ideal for classification and regression tasks</li> <li>• Good performance with highly dimensional data</li> <li>• It is not affected by outliers</li> </ul> | <ul style="list-style-type: none"> <li>• Bad performance with overlapped classes</li> <li>• It exhibits slow speed for training process</li> </ul>            |
| <b>Decision Trees</b>         | Non-parametric methods used for constructing predictive models by learning simple decision rules inferred from the data features                                           | <ul style="list-style-type: none"> <li>• Ideal for classification tasks</li> <li>• Easy to understand and interpret</li> <li>• Handling of categorical data</li> </ul>                               | <ul style="list-style-type: none"> <li>• Tendency to overfit the training data</li> <li>• High computational complexity</li> </ul>                            |
| <b>Random Forest</b>          | An ensemble method consisting of multiple decision trees that are trained independently to make output predictions                                                         | <ul style="list-style-type: none"> <li>• Ideal for classification and regression tasks</li> <li>• Reduced issues with overfitting</li> <li>• Good handling on imbalanced datasets</li> </ul>         | <ul style="list-style-type: none"> <li>• The features need to have strong predictive power</li> <li>• Lack of Interpretability (black box effect)</li> </ul>  |
| <b>Logistic Regression</b>    | A probabilistic technique used to obtain the best fitting model for the relationship between multiple predictors and a dichotomous target variable                         | <ul style="list-style-type: none"> <li>• Ideal for classification and regression tasks</li> <li>• Simple implementation and interpretability</li> </ul>                                              | <ul style="list-style-type: none"> <li>• Low performance for non-linear features</li> <li>• Sensitive to outliers</li> </ul>                                  |

|                                   |                                                                                                                                                                                                                     |                                                                                                                                                                                                                                                     |                                                                                                                                          |
|-----------------------------------|---------------------------------------------------------------------------------------------------------------------------------------------------------------------------------------------------------------------|-----------------------------------------------------------------------------------------------------------------------------------------------------------------------------------------------------------------------------------------------------|------------------------------------------------------------------------------------------------------------------------------------------|
|                                   |                                                                                                                                                                                                                     | <ul style="list-style-type: none"> <li>• Reduced overfitting drawbacks</li> </ul>                                                                                                                                                                   |                                                                                                                                          |
| <b>Artificial Neural Networks</b> | A subset of computing systems structured in neuronal-like multi-layered architectures with the ability to automatically process high dimensional features, capture complex patterns and perform specific operations | <ul style="list-style-type: none"> <li>• Used in computer vision tasks including classification, detection, and segmentation</li> <li>• Good generalisation and robustness of the results</li> <li>• Independence from prior assumptions</li> </ul> | <ul style="list-style-type: none"> <li>• Lack of Interpretability (black box effect)</li> <li>• High computational complexity</li> </ul> |

**Figure S1.** Swarm plot of the RQS distribution according to imaging modality.

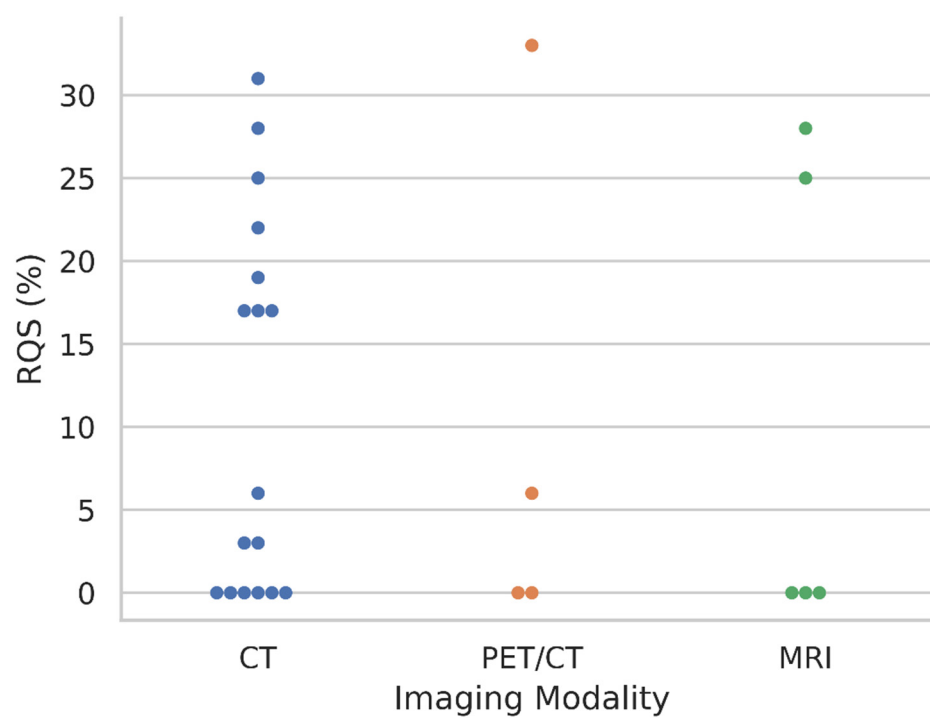

**Figure S2.** Swarm plot of the RQS distribution according to feature type.

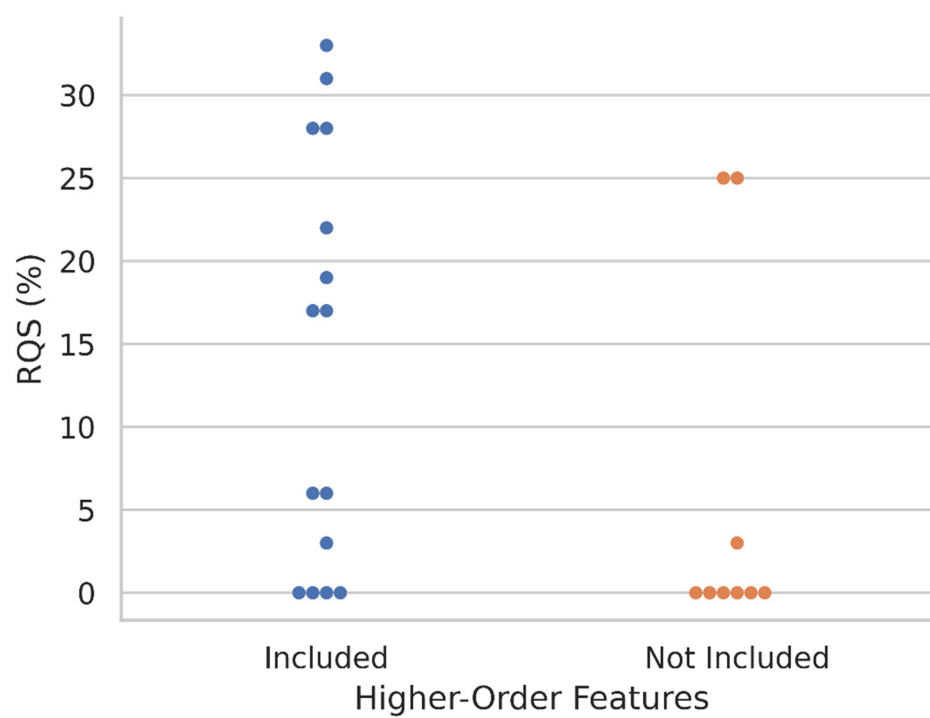

Supplement: s1 [file s1]
